# Supplementary material
Source: bioRxiv or medRxiv preprint supplement (https://www.biorxiv.org/highwire/filestream/123054/field_highwire_adjunct_files/0/311209-1.pdf)
Supplement: Supplementary file [file 311209-1.pdf]

SUPPLEMENTARY MATERIALS

| disorder |            | disorder |            | phi      |            | psi      |            |        |        |       |        |        |        |       |   |
|----------|------------|----------|------------|----------|------------|----------|------------|--------|--------|-------|--------|--------|--------|-------|---|
| Resi MCC | Struct MCC | Resi FPR | Struct FPR | Resi MAE | Struct MAE | Resi MAE | Struct MAE |        |        |       |        |        |        |       |   |
| p-val    | p-val      | n        | n          | p-val    | p-val      | n        | n          |        |        |       |        |        |        |       |   |
| 0.660    | 0.518      | 21       | 0.015      | 0.015    | 0.5322     | 21       | 20.256     | 20.255 | 0.3548 | 21    | 31.832 | 31.170 | 0.7975 | 21    |   |
| 0.604    | 0.502      | 21       | 0.011      | 0.013    |            | 21       | 20.013     | 19.991 |        | 21    | 31.157 | 30.971 |        | 21    |   |
| 0.597    | 0.476      | 21       | 0.026      | 0.041    | 0.0181     | 21       | 21.607     | 21.855 | 0.0012 | 21    | 33.223 | 33.384 | 0.0054 | 21    |   |
| 0.621    | 0.514      | 21       | 0.045      | 0.068    | 0.0006     | 21       |            |        |        |       |        |        |        |       |   |
| disorder |            | disorder |            | phi      |            | psi      |            |        |        |       |        |        |        |       |   |
| Resi MCC | Struct MCC | Resi FPR | Struct FPR | Resi MAE | Struct MAE | Resi MAE | Struct MAE | n      | n      | p-val | p-val  | n      | n      | p-val | n |
| 0.656    | 0.533      | 115      | 0.006      | 0.007    |            | 115      | 17.228     | 16.934 |        | 115   | 25.754 | 25.289 |        | 115   |   |
| 0.663    | 0.529      | 115      | 0.008      | 0.010    | 0.0282     | 115      | 17.465     | 17.084 | 0.2340 | 115   | 26.545 | 25.881 | 0.1129 | 115   |   |
| 0.604    | 0.505      | 115      | 0.027      | 0.044    | 0.0000     | 115      | 17.998     | 17.607 | 0.0000 | 115   | 27.035 | 26.646 | 0.0012 | 115   |   |
| 0.567    | 0.500      | 115      | 0.044      | 0.062    | 0.0000     | 115      |            |        |        |       |        |        |        |       |   |
| disorder |            | disorder |            | phi      |            | psi      |            |        |        |       |        |        |        |       |   |
| Resi MCC | Struct MCC | Resi FPR | Struct FPR | Resi MAE | Struct MAE | Resi MAE | Struct MAE | n      | n      | p-val | p-val  | n      | n      | p-val | n |
|          |            |          |            |          |            |          | 20.070     | 20.218 | 0.3941 | 513   | 27.981 | 28.240 | 0.4796 | 513   |   |
|          |            |          |            |          |            |          | 20.231     | 20.325 | 0.7879 | 513   | 28.635 | 28.798 | 0.1268 | 513   |   |
|          |            |          |            |          |            |          | 20.061     | 20.299 |        | 513   | 27.883 | 28.410 |        | 513   |   |

|         | Per-residue performance |            |           |     | Mean of per-structure performance |            |           |     |          |            |           |     |          |            |           |     |          |            |           |   |
|---------|-------------------------|------------|-----------|-----|-----------------------------------|------------|-----------|-----|----------|------------|-----------|-----|----------|------------|-----------|-----|----------|------------|-----------|---|
|         | Resi PCC                | Struct PCC | PCC p-val | n   | Resi PCC                          | Struct PCC | PCC p-val | n   | Resi ACC | Struct ACC | ACC p-val | n   | Resi ACC | Struct ACC | ACC p-val | n   | Resi ACC | Struct ACC | ACC p-val | n |
| CASP12  | rsa                     |            |           |     | asa                               |            |           |     | q3       |            |           |     | q8       |            |           |     |          |            |           |   |
| mmseqs  | 0.726                   | 0.712      | 0.712     | 21  | 0.735                             | 0.735      | 0.5292    | 21  | 0.819    | 0.818      | 0.5181    | 21  | 0.703    | 0.716      | 0.7597    | 21  |          |            |           |   |
| hhblits | 0.725                   | 0.712      | 0.9156    | 21  | 0.737                             | 0.738      |           | 21  | 0.824    | 0.825      |           | 21  | 0.711    | 0.718      |           | 21  |          |            |           |   |
| nsp1    | 0.617                   | 0.613      | 0.0000    | 21  | 0.641                             | 0.653      | 0.0000    | 21  | 0.709    | 0.682      | 0.0001    | 21  |          |            |           |     |          |            |           |   |
| spider  |                         |            |           |     | 0.687                             | 0.688      | 0.0029    | 21  | 0.791    | 0.774      | 0.0004    | 21  |          |            |           |     |          |            |           |   |
| raptorx |                         |            |           |     |                                   |            |           |     | 0.786    | 0.772      | 0.0017    | 21  | 0.661    | 0.657      | 0.0022    | 21  |          |            |           |   |
| jpred4  |                         |            |           |     |                                   |            |           |     | 0.760    | 0.746      | 0.0000    | 21  |          |            |           |     |          |            |           |   |
| TS115   | rsa                     |            |           |     | asa                               |            |           |     | q3       |            |           |     | q8       |            |           |     |          |            |           |   |
| mmseqs  | 0.778                   | 0.751      | 0.7936    | 115 | 0.797                             | 0.785      | 0.9783    | 115 | 0.857    | 0.862      | 0.3780    | 115 | 0.750    | 0.763      | 0.0401    | 115 |          |            |           |   |
| hhblits | 0.775                   | 0.750      | 0.7936    | 115 | 0.795                             | 0.785      | 0.9783    | 115 | 0.853    | 0.859      | 0.3780    | 115 | 0.744    | 0.756      | 0.0401    | 115 |          |            |           |   |
| nsp1    | 0.661                   | 0.640      | 0.0000    | 115 | 0.691                             | 0.679      | 0.0000    | 115 | 0.326    | 0.317      | 0.0000    | 115 |          |            |           |     |          |            |           |   |
| spider  |                         |            |           |     | 0.771                             | 0.755      | 0.0000    | 115 | 0.838    | 0.843      | 0.0000    | 115 |          |            |           |     |          |            |           |   |
| raptorx |                         |            |           |     |                                   |            |           |     | 0.822    | 0.829      | 0.0000    | 115 | 0.716    | 0.731      | 0.0000    | 115 |          |            |           |   |
| jpred4  |                         |            |           |     |                                   |            |           |     | 0.751    | 0.784      | 0.0000    | 108 |          |            |           |     |          |            |           |   |
| CB513   | rsa                     |            |           |     | asa                               |            |           |     | q3       |            |           |     | q8       |            |           |     |          |            |           |   |
| mmseqs  | 0.794                   | 0.778      | 0.1115    | 513 | 0.807                             | 0.799      | 0.1614    | 513 | 0.853    | 0.851      | 0.3244    | 513 | 0.723    | 0.722      | 0.2298    | 513 |          |            |           |   |
| hhblits | 0.788                   | 0.774      | 0.1115    | 513 | 0.804                             | 0.796      | 0.1614    | 513 | 0.853    | 0.849      | 0.3244    | 513 | 0.720    | 0.719      | 0.2298    | 513 |          |            |           |   |
| nsp1    | 0.701                   | 0.693      | 0.0000    | 513 | 0.723                             | 0.721      | 0.0000    | 513 | 0.787    | 0.783      | 0.0000    | 513 |          |            |           |     |          |            |           |   |
| spider  |                         |            |           |     | 0.797                             | 0.790      | 0.0000    | 513 | 0.848    | 0.844      | 0.0025    | 513 |          |            |           |     |          |            |           |   |
| raptorx |                         |            |           |     |                                   |            |           |     | 0.827    | 0.827      | 0.0000    | 508 | 0.703    | 0.704      | 0.0000    | 508 |          |            |           |   |
| jpred4  |                         |            |           |     |                                   |            |           |     | 0.683    | 0.775      | 0.0000    | 416 |          |            |           |     |          |            |           |   |

**Supplementary table S1:** Results of the method's validation on independent test datasets. The performance of NetSurfP-2.0 using HH-suite and MMSeqs2 profiles, NetSurfP-1.0, Spider3, SPOT-disorder, RaptorX, and JPred4, is displayed for the CASP12, TS115, and CB513 datasets. SPOT-disorder and Spider3 predictions are reported as a single row. The following performance metrics are

used: Pearson Correlation Coefficient (PCC), Q3 and Q8 accuracy, Matthew's Correlation Coefficient (MCC), False Positive Rate (FPR), and mean absolute error (MAE) in degrees. The different predicted features are reported in the column header, together with the corresponding performance metric. All metrics are calculated both *per residue*, i.e. as an average over all residues in all structures, and *per structure*, i.e. as the average of the metric per structure, which is in turn calculated as the average of all its residues. For each feature and each dataset, a p-value is calculated by performing a 2-tailed paired Student's t-test on the corresponding performances per structure.

| <b>CASP12</b> | pcc        | pcc        | Q8        | Q3        | MCC             | MAE        | MAE        |
|---------------|------------|------------|-----------|-----------|-----------------|------------|------------|
|               | <b>RSA</b> | <b>ASA</b> | <b>Q8</b> | <b>Q3</b> | <b>Disorder</b> | <b>Phi</b> | <b>Psi</b> |
| <b>Fold 1</b> | 0.7282     | 0.7365     | 0.7000    | 0.8189    | 0.6237          | 20.3031    | 31.6195    |
| <b>Fold 2</b> | 0.7284     | 0.7373     | 0.7041    | 0.8218    | 0.6448          | 20.1904    | 31.6913    |
| <b>Fold 3</b> | 0.7294     | 0.7383     | 0.6917    | 0.8069    | 0.5708          | 20.2208    | 31.6077    |
| <b>Fold 4</b> | 0.7291     | 0.7404     | 0.7062    | 0.8184    | 0.6597          | 20.3522    | 31.8715    |
|               |            |            |           |           |                 |            |            |
|               |            |            |           |           |                 |            |            |
| <b>TS115</b>  |            |            |           |           |                 |            |            |
|               | <b>RSA</b> | <b>ASA</b> | <b>Q8</b> | <b>Q3</b> | <b>Disorder</b> | <b>Phi</b> | <b>Psi</b> |
| <b>Fold 1</b> | 0.7833     | 0.8025     | 0.7482    | 0.8577    | 0.6650          | 17.1660    | 25.4516    |
| <b>Fold 2</b> | 0.7826     | 0.8016     | 0.7506    | 0.8590    | 0.6618          | 17.2033    | 25.4277    |
| <b>Fold 3</b> | 0.7830     | 0.8020     | 0.7464    | 0.8561    | 0.6548          | 17.2587    | 25.5880    |
| <b>Fold 4</b> | 0.7806     | 0.7998     | 0.7482    | 0.8565    | 0.6601          | 17.2485    | 25.7665    |
|               |            |            |           |           |                 |            |            |
|               |            |            |           |           |                 |            |            |
| <b>CB513</b>  |            |            |           |           |                 |            |            |
|               | <b>RSA</b> | <b>ASA</b> | <b>Q8</b> | <b>Q3</b> | <b>Disorder</b> | <b>Phi</b> | <b>Psi</b> |
| <b>Fold 1</b> | 0.8002     | 0.8132     | 0.7211    | 0.8519    | 0.1045          | 20.1689    | 27.9715    |
| <b>Fold 2</b> | 0.7991     | 0.8123     | 0.7221    | 0.8533    | 0.1283          | 20.1562    | 28.0746    |
| <b>Fold 3</b> | 0.7990     | 0.8123     | 0.7212    | 0.8526    | 0.0815          | 20.1293    | 27.9960    |
| <b>Fold 4</b> | 0.7985     | 0.8116     | 0.7194    | 0.8508    | 0.1244          | 20.2399    | 28.1678    |

**Supplementary table S2:** Results of the method's validation using a 4-fold validation approach. The metric used for each column is reported in the first row.



| TS115      |        |        |        |        |          |         |         |
|------------|--------|--------|--------|--------|----------|---------|---------|
|            | RSA    | ASA    | Q8     | Q3     | Disorder | Phi     | Psi     |
| Current    | 0.7845 | 0.8033 | 0.7489 | 0.8566 | 0.6664   | 17.2269 | 25.6000 |
| PDBSEQ PRO | 0.7860 | 0.8043 | 0.7349 | 0.8461 |          | 16.8226 | 24.9746 |
| PDBSEQ     | 0.7851 | 0.8039 | 0.7381 | 0.8477 |          | 16.7593 | 24.8865 |
| 1 output   | 0.7716 | 0.7924 | 0.7495 | 0.8600 | 0.6374   |         |         |
|            |        |        |        |        |          |         |         |
| CB513      |        |        |        |        |          |         |         |
|            | RSA    | ASA    | Q8     | Q3     | Disorder | Phi     | Psi     |
| Current    | 0.7992 | 0.8126 | 0.7208 | 0.8515 |          | 20.1228 | 28.2267 |
| PDBSEQ PRO | 0.8067 | 0.8193 | 0.7325 | 0.8582 |          | 19.7445 | 27.2077 |
| PDBSEQ     | 0.8070 | 0.8196 | 0.7334 | 0.8585 |          | 19.7169 | 27.1891 |
| 1 output   | 0.7879 | 0.8022 | 0.7211 | 0.8534 |          |         |         |

**Supplementary table S4:** A comparison of the results of NetSurfP-2.0 (Current) with respect of those obtained by training only on non-disordered region, using profiles obtained with the whole sequence (PDBSEQ PRO) or with the sequence of only non-disordered residue (PDBSEQ), and with models trained only on a single output variable (1 output).

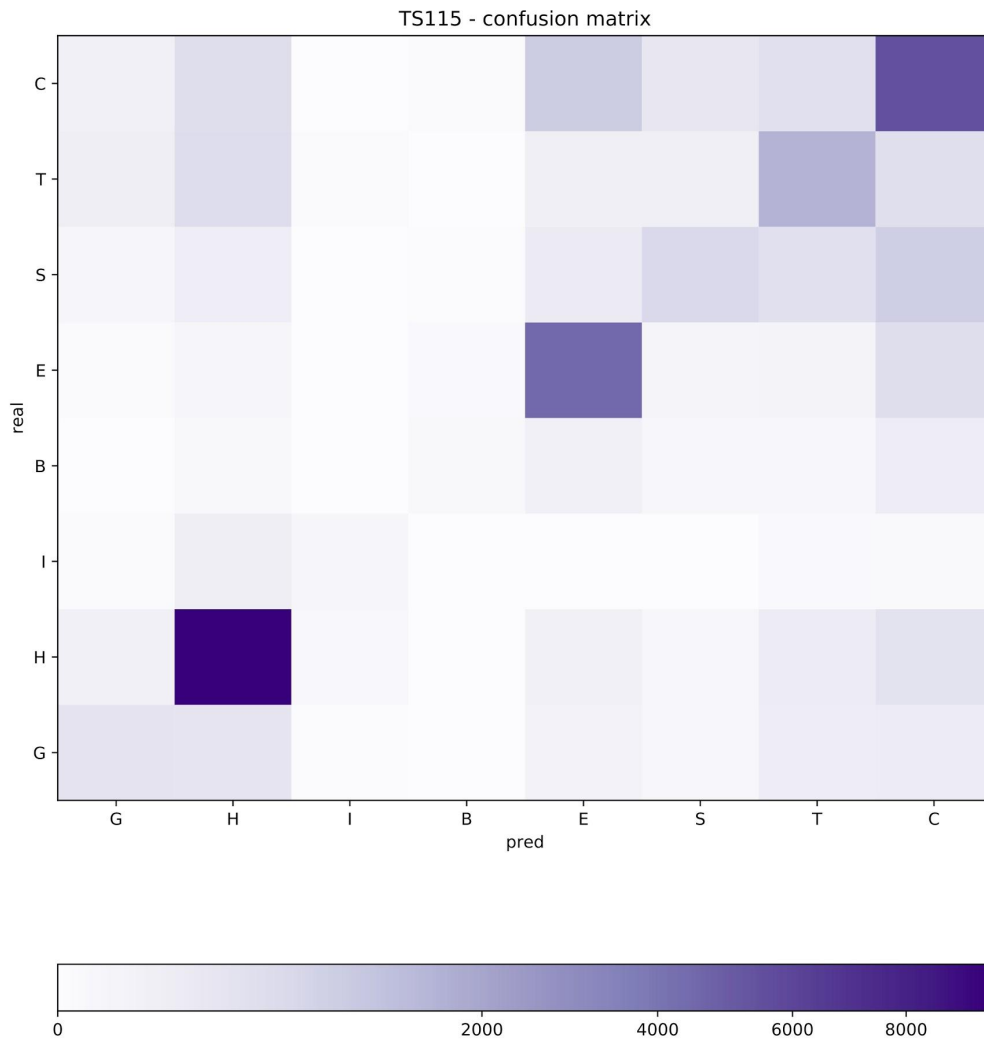

**Supplementary figure S1:** Graphical representation of the 8-class secondary structure prediction confusion matrix. A non-linear scale was used for the coloring, as displayed in the bottom bar.

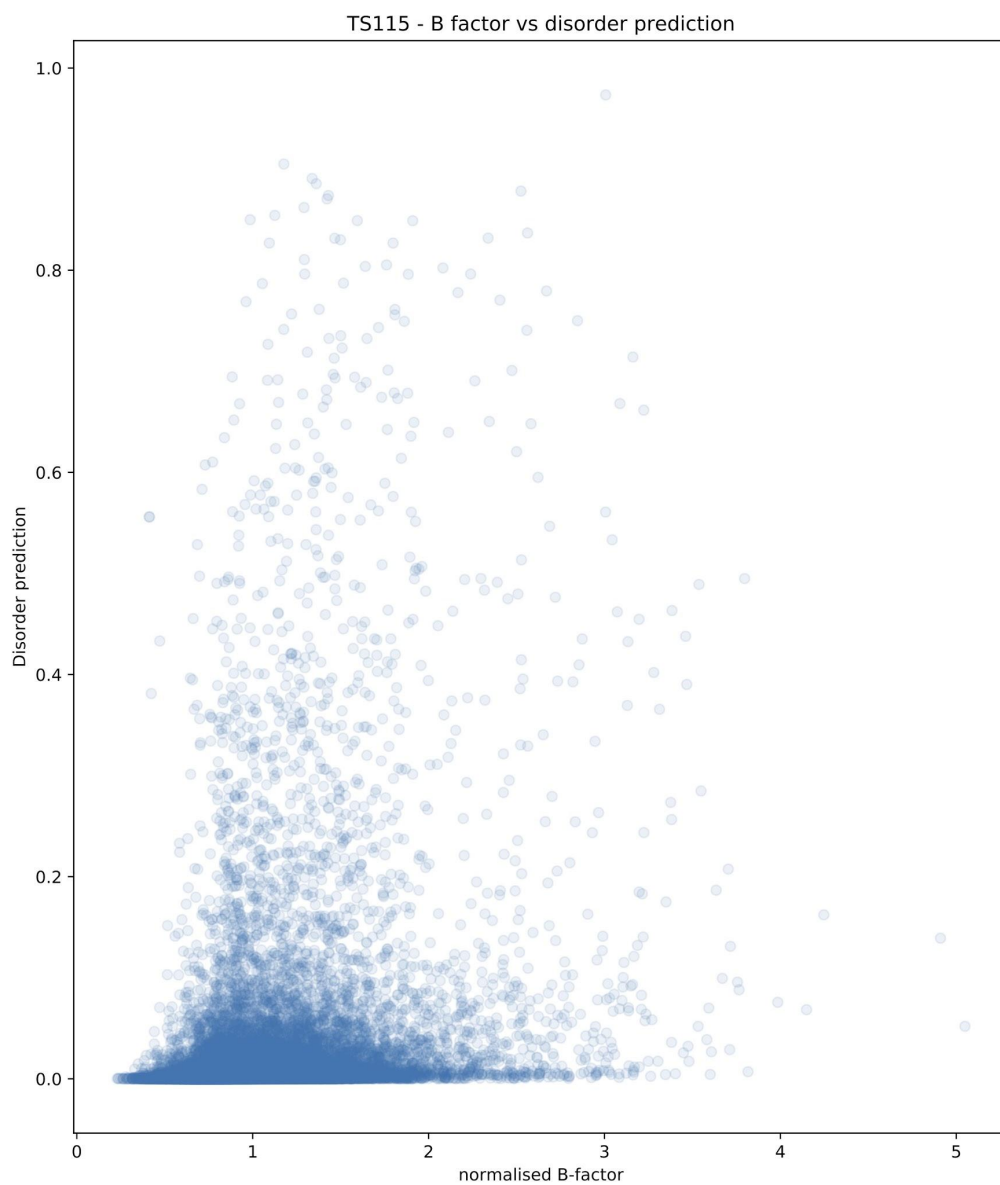

**Supplementary figure S2:** scatterplot of residue normalised B-factors plotted against their disorder prediction.

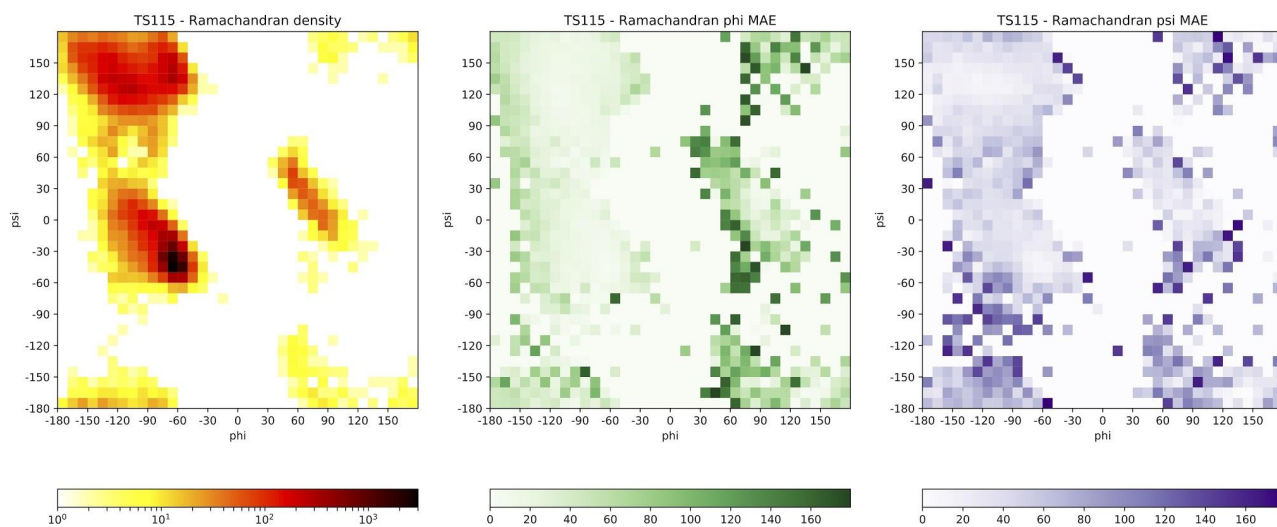

**Supplementary figure S3:** Ramachandran plot of all residues in the TS115 dataset (left panel), together with the average error in the prediction of their phi (central panel, shades of green) and psi (right panel, shades of blue).
